# Supplementary material for: Novel Heterotypic Rox Sites for Combinatorial Dre Recombination Strategies
Source: PubMed Central journal article supplement (PMC4777119; doi:10.1534/g3.115.025841), 2015-12-29
Supplement: supp_g3.115.025841_TableS2.pdf [file supp_g3.115.025841_TableS2.pdf]

**Table S2.**

a, b, Medians, Means, Standard deviations, number of images, individual cells quantified, and independent transfections for experiments described in Figure 2 (a) and Figure 3 (b).  
 c, d, Significance tests for the same experiments. Significance levels reported in figures reflect the outcome of the Kolmogorov-Smirnov 2 test for comparing two samples with unknown distribution.

**a**

| HEK293-Dre transfection   | Recombined/Transfected cells (%) |                  |                 |                  |                 |
|---------------------------|----------------------------------|------------------|-----------------|------------------|-----------------|
|                           | proxP-R-roxP-G                   | prox12-R-rox12-G | proxP-R-rox12-G | prox85-R-roxP-85 | proxP-R-rox85-G |
| Medians                   | 100.00                           | 96.71            | 0.00            | 90.70            | 0.00            |
| Means                     | 99.50                            | 94.81            | 0.00            | 90.75            | 0.00            |
| Standard deviations       | 1.20                             | 5.15             | 0.00            | 5.80             | 0.00            |
| Images quantified         | 6                                | 6                | 6               | 6                | 6               |
| Independent transfections | 2                                | 2                | 2               | 2                | 2               |
| Cells Counted             | 274                              | 586              | 316             | 379              | 313             |

**b**

| FREX Experiment<br>HEK293-Dre and<br>HEK293-Cre transfection | Recombined/Transfected cells (%) |      |                 |      |            |      |
|--------------------------------------------------------------|----------------------------------|------|-----------------|------|------------|------|
|                                                              | pAAV-FREX                        |      | proxP-R-rox12-G |      | pAAV-PTPY* |      |
|                                                              | Dre                              | Cre  | Dre             | Cre  | Dre        | Cre  |
| Medians                                                      | 97.92                            | 0.00 | 95.67           | 0.00 | 0.00       | 6.46 |
| Means                                                        | 95.81                            | 0.00 | 95.34           | 0.00 | 0.00       | 8.96 |
| Standard deviations                                          | 5.67                             | 0.00 | 1.91            | 0.00 | 0.00       | 5.38 |
| Images quantified                                            | 6                                | 6    | 6               | 6    | 6          | 6    |
| Independent transfections                                    | 2                                | 2    | 2               | 2    | 2          | 2    |
| Cells Counted                                                | 112                              | 223  | 436             | 328  | 3049       | 3042 |

\*note = recombined cells are reported as % from overall DAPI cells, as there is no reporter expression before recombination

**c**

| HEK293-Dre transfection               | prox12-R-rox12-G vs proxP-R-rox12-G | prox85-R-roxP-85 vs proxP-R-rox85-G | proxP-R-roxP-G vs prox12-R-rox12-G | proxP-R-roxP-G vs prox85-R-roxP-85 |
|---------------------------------------|-------------------------------------|-------------------------------------|------------------------------------|------------------------------------|
| Student T test null rejected          | 1                                   | 1                                   | 0                                  | 1                                  |
| Student T test p value                | 6.93E-13                            | 3.48E-12                            | 0.0547                             | 0.0047                             |
| Kolmogorov-Smirnov test null rejected | 1                                   | 1                                   | 0                                  | 1                                  |
| Kolmogorov-Smirnov test p value       | 0.0013                              | 0.0013                              | 0.0766                             | 0.0122                             |

**d**

| FREX experiment HEK293-Dre vs Cre     | Dre vs Cre pAAV-FREX | Dre vs Cre proxP-R-roxP-G vs | Dre: pAAV-FREX vs prox12-R-rox12-G | Dre vs Cre pAAV-PTPY |
|---------------------------------------|----------------------|------------------------------|------------------------------------|----------------------|
| Student T test null rejected          | 1                    | 1                            | 0                                  | 1                    |
| Student T test p value                | 1.62E-12             | 3.35E-17                     | 0.8487                             | 0.0022               |
| Kolmogorov-Smirnov test null rejected | 1                    | 1                            | 0                                  | 1                    |
| Kolmogorov-Smirnov test p value       | 0.0013               | 0.0013                       | 0.3180                             | 0.0013               |
